# Supplementary material
Source: PubMed Central journal article supplement (PMC9054000)
Supplement: NIHMS1789147-supplement-1.pdf [file NIHMS1789147-supplement-1.pdf]

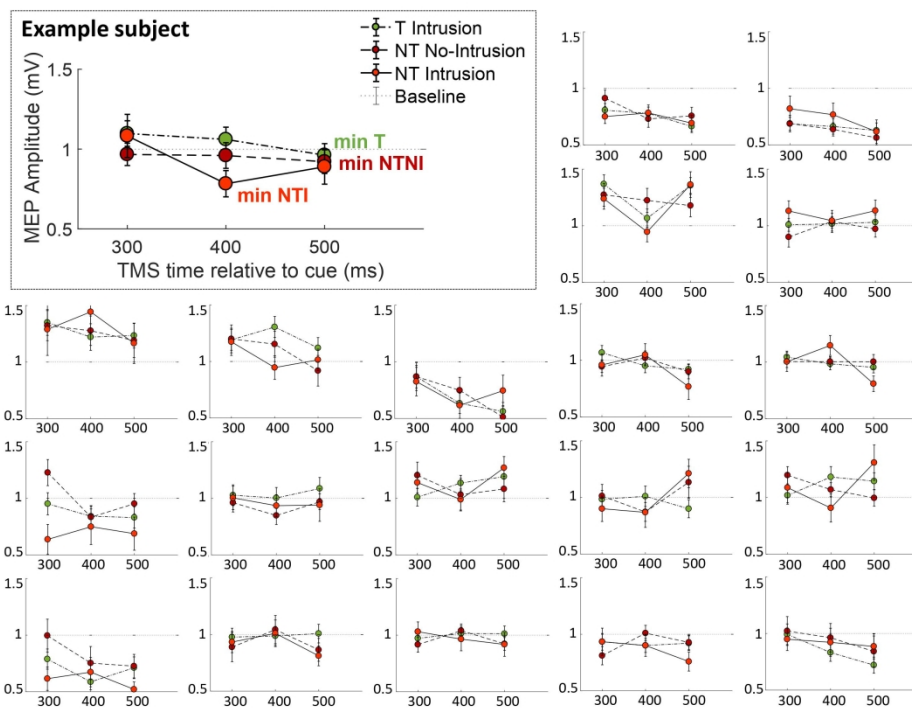

Supplementary Fig. 1. Example subject: selection of the minimum MEP amplitude per condition (T, NTNI, NTI) across the three TMS pulse times (300, 400, 500). For all other subjects (n=19): MEP amplitudes per condition across the three TMS pulse times.

254x190mm (300 x 300 DPI)
